# Supplementary material for: Partial melting of amphibole–clinozoisite eclogite at the pressure maximum (eclogite type locality, Eastern Alps, Austria)
Source: Copernicus journal article supplement (doi:10.5194/ejm-35-715-2023), 2023-09-04
Supplement: Supplementary file 1 [file ejm-35-715-2023-supplement.zip]

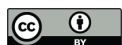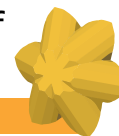

*Supplement of*

**Partial melting of amphibole–clinozoisite eclogite at the pressure maximum (eclogite type locality, Eastern Alps, Austria)**

**Simon Schorn et al.**

*Correspondence to:* Simon Schorn ([simon.schorn@uni-graz.at](mailto:simon.schorn@uni-graz.at))

- [ejm-35-715-2023-supplement-title-page.pdf](#)
- [Table\\_S1\\_min\\_chem\\_all.xlsx](#)
- [Table\\_S2\\_min\\_chem\\_traces.xlsx](#)
- [Table\\_S3\\_suppl\\_bulk\\_compositions.xlsx](#)
- [meltingHP\\_supplementary.pdf](#)

The copyright of individual parts of the supplement might differ from the article licence.
