# Supplementary material for: Partial melting of amphibole–clinozoisite eclogite at the pressure maximum (eclogite type locality, Eastern Alps, Austria)
Source: Copernicus journal article supplement (doi:10.5194/ejm-35-715-2023), 2023-09-04
Supplement: Supplementary file 2 [file ejm-35-715-2023-supplement.zip]

# **Partial melting of amphibole–clinozoisite eclogite at the pressure maximum (eclogite type-locality, Eastern Alps, Austria) – Supplementary Files**

Simon Schorn<sup>a,\*</sup>, Anna Rogowitz<sup>a,b</sup> & Christoph Hauzenberger<sup>a</sup>

<sup>a</sup>Institute of Earth Sciences, NAWI Graz Geocenter, University of Graz, Universitätsplatz 2, 8010 Graz, Austria

<sup>b</sup>Department of Geology, University of Vienna, Josef Holaubek-Platz 2, 1090 Vienna, Austria

\*corresponding author e-mail: [simon.schorn@uni-graz.at](mailto:simon.schorn@uni-graz.at)

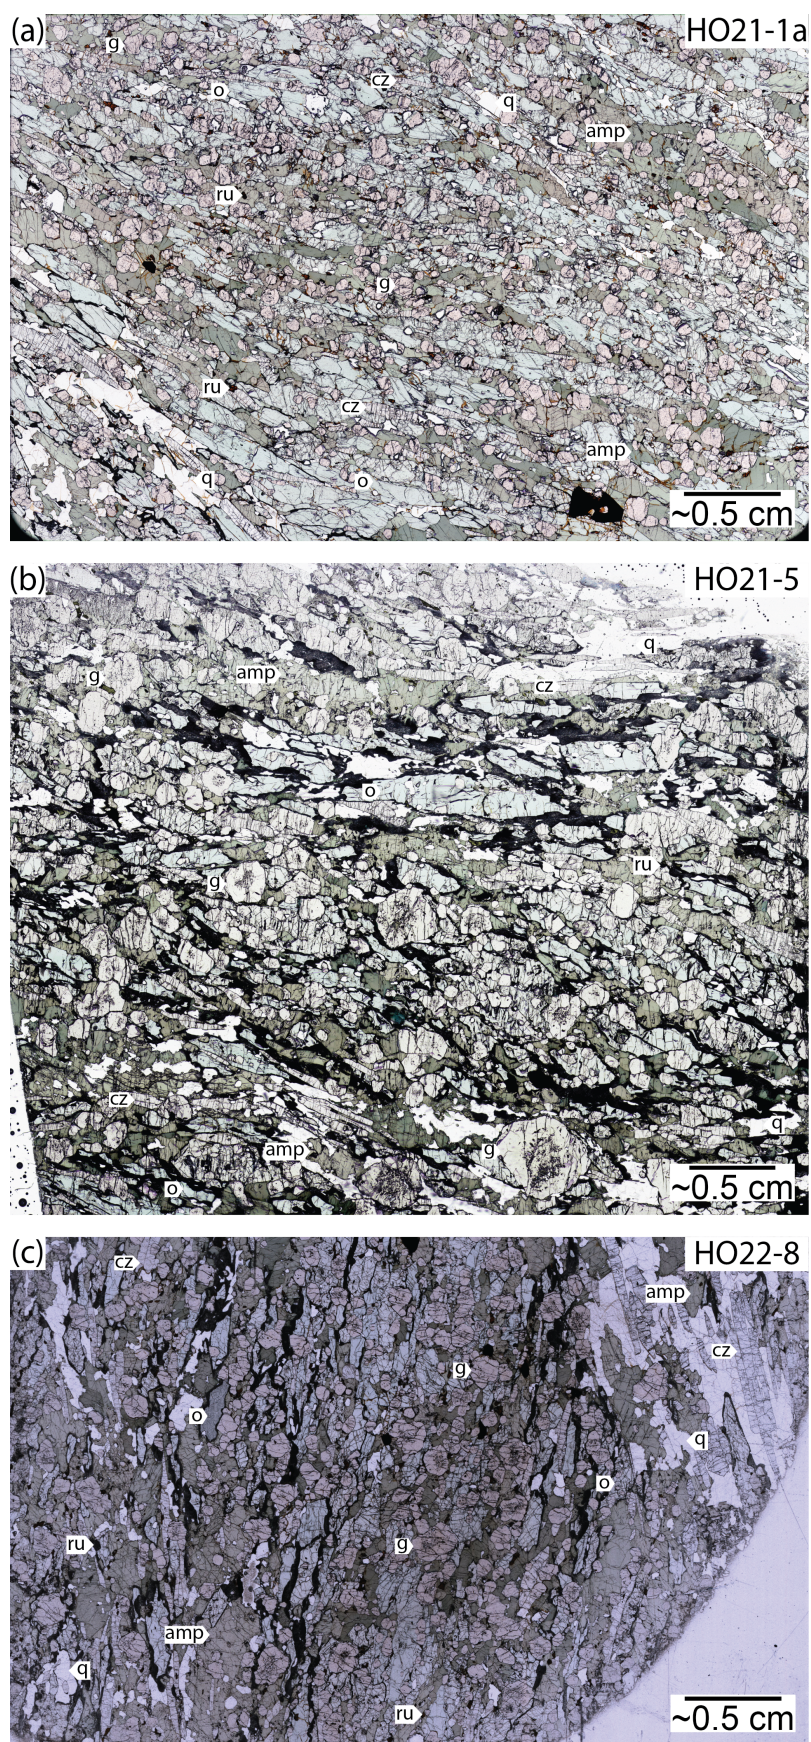

Figure S1: Thin section scans showing modal variability of the investigated samples.

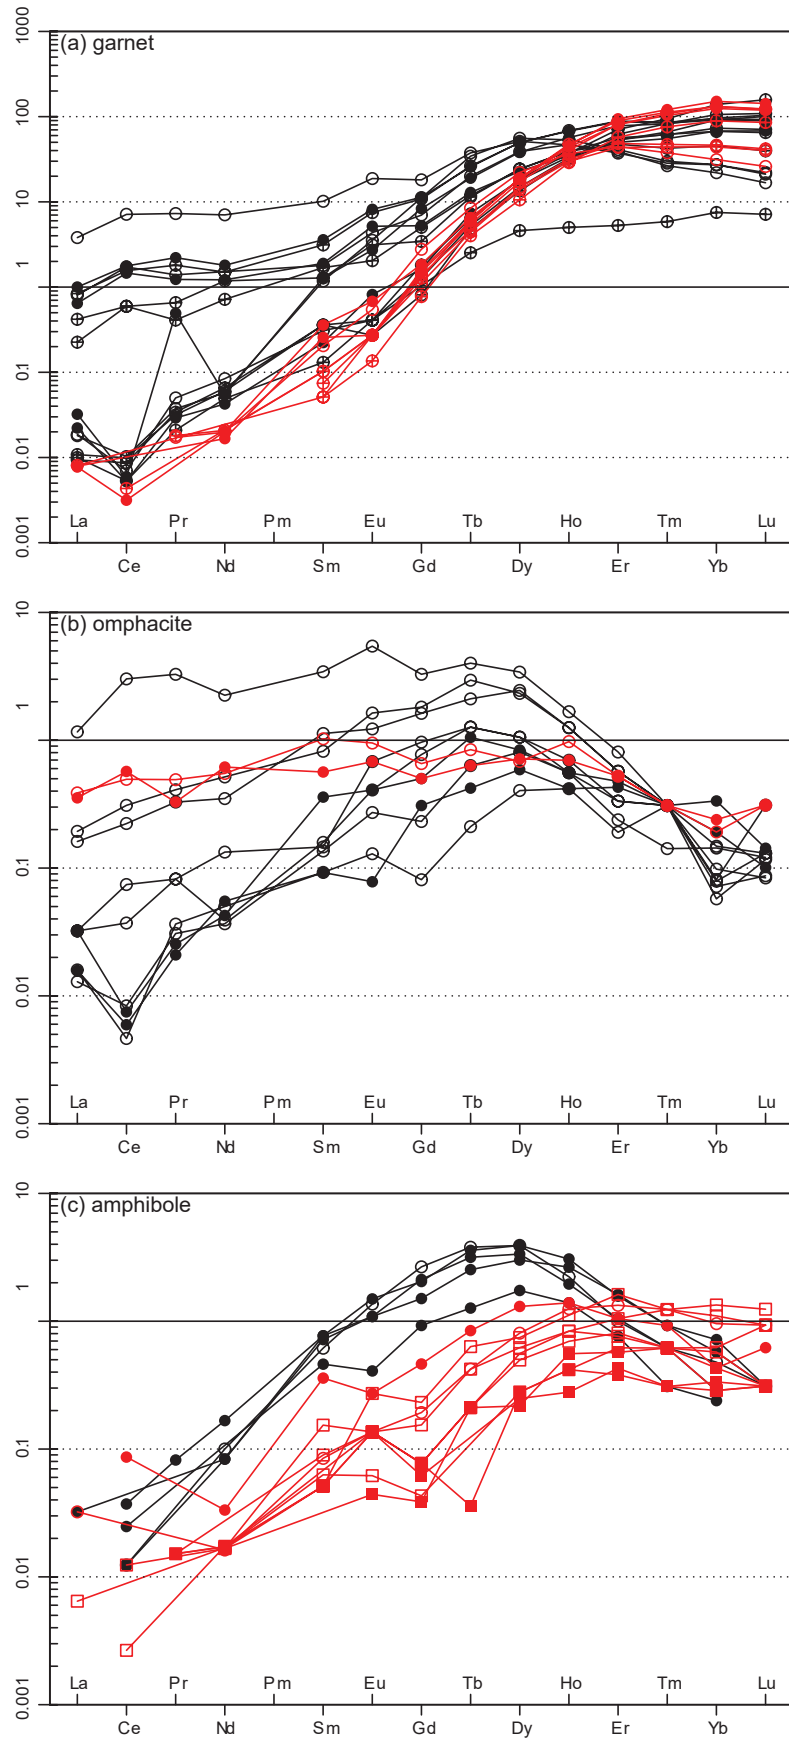

Figure S2: Chondrite-normalized rare earth element spider plots. Black: sample HO22-2, red: sample HO23-1F. Filled symbols are for cores, empty symbols are rims. (a) Garnet. Cross-symbols are for mantle analyses. (b) Omphacite. (c) Amphibole. Dots are for matrix mineral, squares are selvage amphibole.
